# Supplementary material for: Anti-SARS-CoV-2 Activity of Rhamnan Sulfate from Monostroma nitidum
Source: MDPI journal article supplement (doi:10.3390/md19120685), 2021-11-30
Supplement: s1 [file s1]

# Anti-SARS-CoV-2 activity of rhamnan sulfate from *Monostroma nitidum*

## Supplementary Data

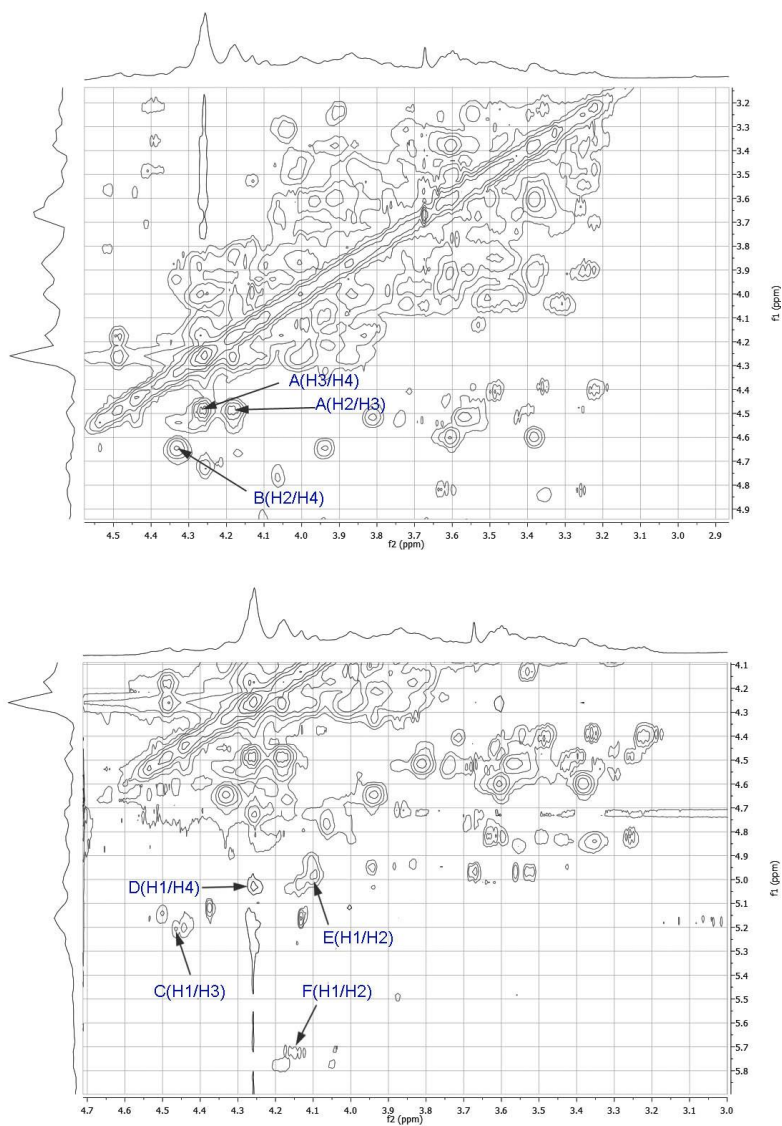

**Figure S1** TOCSY spectrum of RS. A,  $\alpha$ -L-Rhap3,4SO<sub>3</sub><sup>-</sup>(1→; B,  $\alpha$ -L-Rhap2,4SO<sub>3</sub><sup>-</sup>(1→; C, →2)- $\alpha$ -L-Rhap3SO<sub>3</sub><sup>-</sup>(1→; D,  $\alpha$ -L-Rhap4SO<sub>3</sub><sup>-</sup>(1→; E, →3)- $\alpha$ -L-Rhap4SO<sub>3</sub><sup>-</sup>(1→; F: →3)- $\alpha$ -L-Rhap1SO<sub>3</sub><sup>-</sup>
